# Supplementary material for: Aircraft Engine Dust Ingestion at Global Airports
Source: Copernicus journal article supplement (doi:10.5194/egusphere-2023-662), 2023-05-22
Supplement: Supplementary file 1 [file egusphere-2023-662-supplement.pdf]

## Supplement

| Region                                              | Lidar Ratio at 532 nm (sr) |
|-----------------------------------------------------|----------------------------|
| Western/Central Sahara Desert, North Atlantic Ocean | 56                         |
| Eastern Sahara Desert                               | 53                         |
| Middle East Arabian Penninsula, Central Asia        | 40                         |
| South and East Asia, North Pacific Ocean            | 46                         |
| Europe                                              | 56                         |
| North America                                       | 49                         |
| South America                                       | 42                         |

Table S 1: Regional lidar ratios applied in LIVAS dataset taken from Amiridis et al., (2013), Marinou et al., (2017), and Proestakis et al., (2018).

| Flight Phase | t/s | t/min | z/feet | z/m   | w <sub>core</sub> /kg/s | k <sub>f</sub> |
|--------------|-----|-------|--------|-------|-------------------------|----------------|
| taxi         | 890 | 14.8  | 0      | 0     | 19                      | 0.9            |
| take-off     | 10  | 0.2   | 0      | 0     | 112                     | 0.7            |
|              | 60  | 1.0   | 35     | 11    | 114                     | 0.7            |
|              | 60  | 1.0   | 1,500  | 457   | 111                     | 0.7            |
| climb        | 3   | 0.1   | 1,500  | 457   | 99                      | 0.8            |
|              | 10  | 0.2   | 2,500  | 762   | 97                      | 0.8            |
|              | 23  | 0.4   | 4,000  | 1,219 | 95                      | 0.8            |
|              | 45  | 0.8   | 6,000  | 1,829 | 91                      | 0.8            |
|              | 49  | 0.8   | 8,000  | 2,438 | 88                      | 0.8            |
|              | 51  | 0.9   | 10,000 | 3,048 | 83                      | 0.8            |
|              | 60  | 1.0   | 12,000 | 3,658 | 82                      | 0.8            |
|              | 80  | 1.3   | 14,000 | 4,267 | 79                      | 0.8            |
|              | 100 | 1.7   | 16,000 | 4,877 | 76                      | 0.8            |
|              | 120 | 2.0   | 20,000 | 6,096 | 69                      | 0.8            |

Table S 2: Departure (ascent) values applied to calculate dust dose, taken from Clarkson (2020).

| Flight Phase      | t/s | t/min | z/feet | z/m   | w <sub>core</sub> /kg/s | k <sub>f</sub> |
|-------------------|-----|-------|--------|-------|-------------------------|----------------|
| ground            | 600 | 10.0  | 0      | 0     | 19.23                   | 0.9            |
|                   | 16  | 0.3   | 0      | 0     | 90.4                    | 0.7            |
|                   | 25  | 0.4   | 0      | 0     | 27.03                   | 0.8            |
| Hold and approach | 180 | 3.0   | 1,500  | 457   | 28.17                   | 0.8            |
|                   | 600 | 10.0  | 3,000  | 914   | 46.95                   | 0.8            |
| Descent           | 25  | 0.4   | 1,500  | 457   | 18.82                   | 1.0            |
|                   | 96  | 1.6   | 2,000  | 610   | 18.69                   | 1.0            |
|                   | 91  | 1.5   | 4,000  | 1,219 | 18.1                    | 1.0            |
|                   | 87  | 1.5   | 6,000  | 1,829 | 17.28                   | 1.0            |
|                   | 85  | 1.4   | 8,000  | 2,438 | 16.24                   | 1.0            |
|                   | 83  | 1.4   | 10,000 | 3,048 | 15.29                   | 1.0            |
|                   | 81  | 1.4   | 12,000 | 3,658 | 15.06                   | 1.0            |

|  |    |     |        |       |       |     |
|--|----|-----|--------|-------|-------|-----|
|  | 80 | 1.3 | 14,000 | 4,267 | 14.7  | 1.0 |
|  | 78 | 1.3 | 16,000 | 4,877 | 14.38 | 1.0 |
|  | 76 | 1.3 | 18,000 | 5,486 | 14.7  | 1.0 |
|  | 75 | 1.3 | 20,000 | 6,096 | 16.33 | 1.0 |

Table S 3: Arrival (descent) values applied to calculate dust dose, taken from Clarkson (2020).

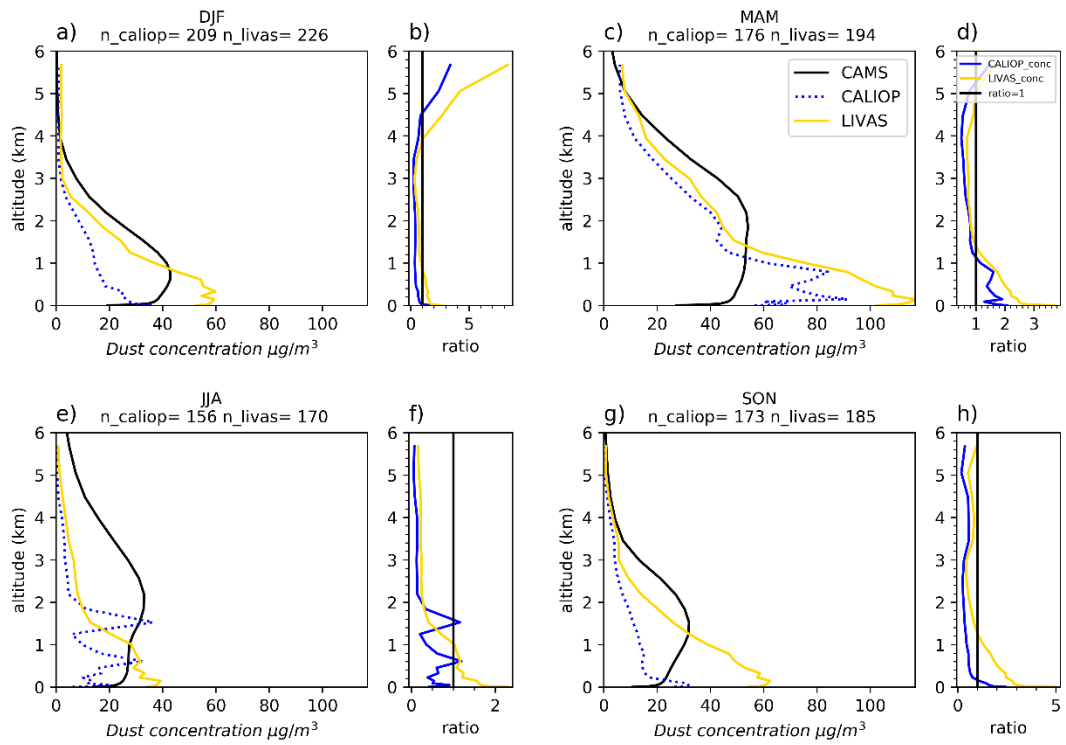

Figure S 1: Same as Figure 4 in main text, except for Beijing.

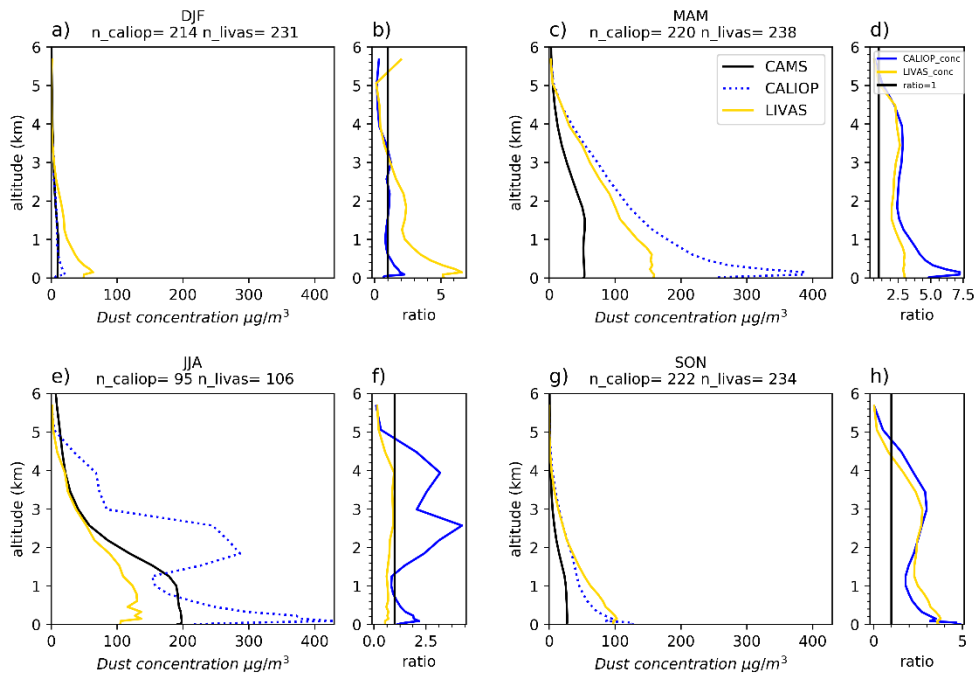

Figure S2: Same as Figure 4 in main text, except for Delhi

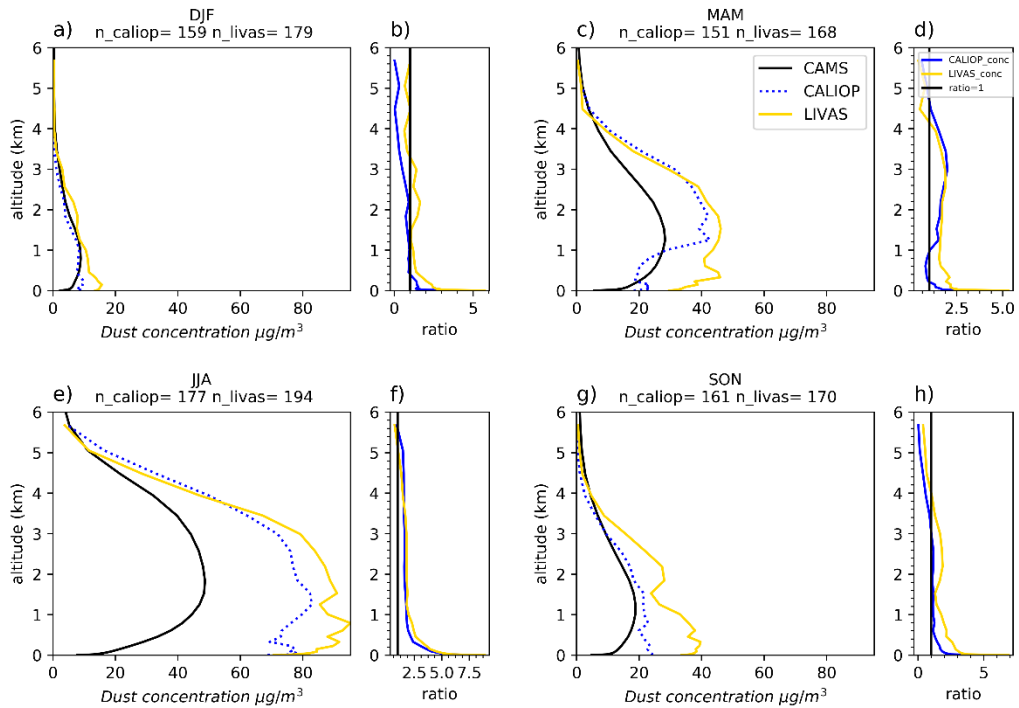

Figure S3: Same as Figure 4 in main text, except for Marrakesh

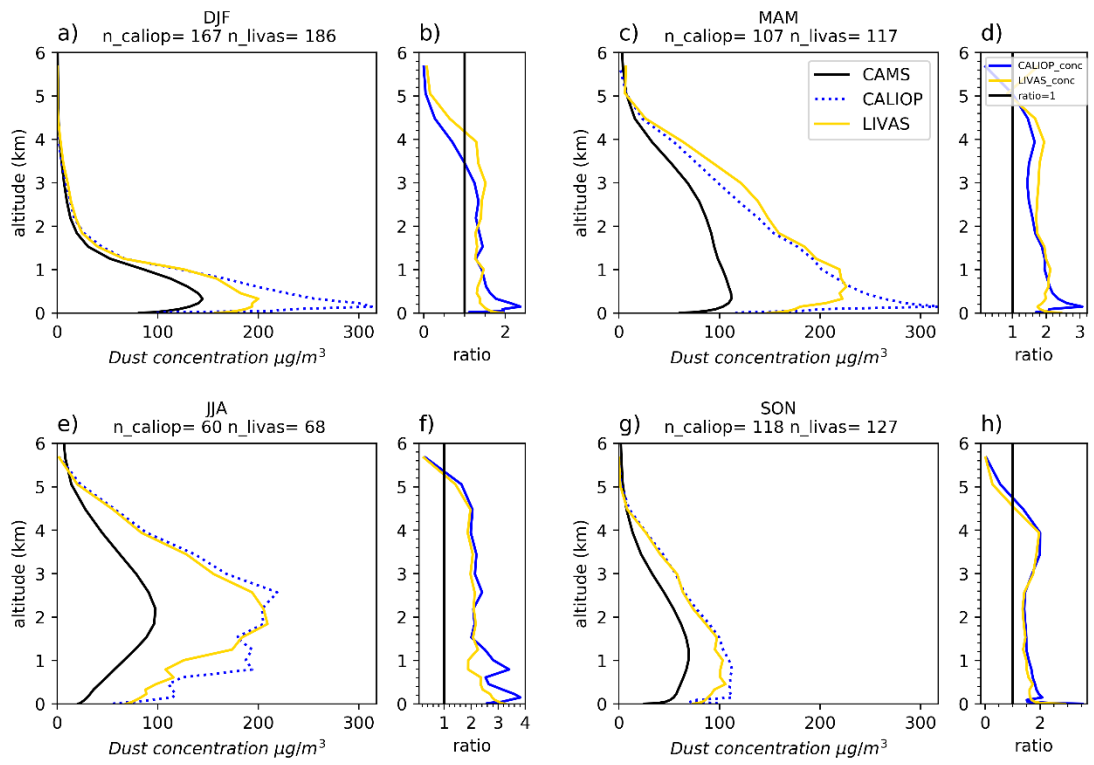

Figure S 4: Same as Figure 4 in main text, except for Niamey.

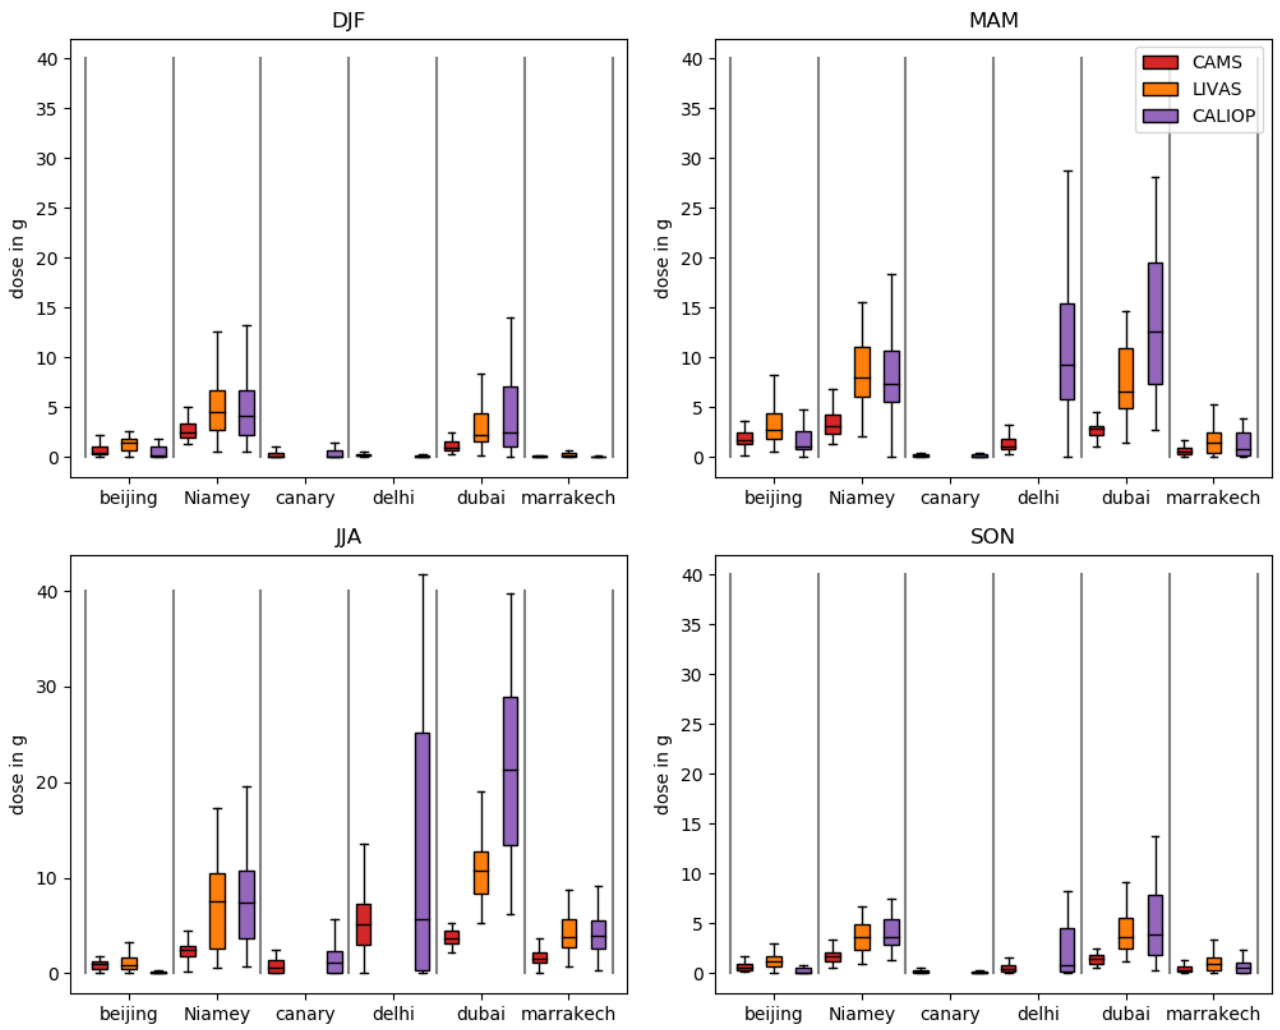

Figure S 5: Same as Figure 8 in main text, except for ascent (departure).
